# Supplementary material
Source: PubMed Central journal article supplement (PMC5087317)

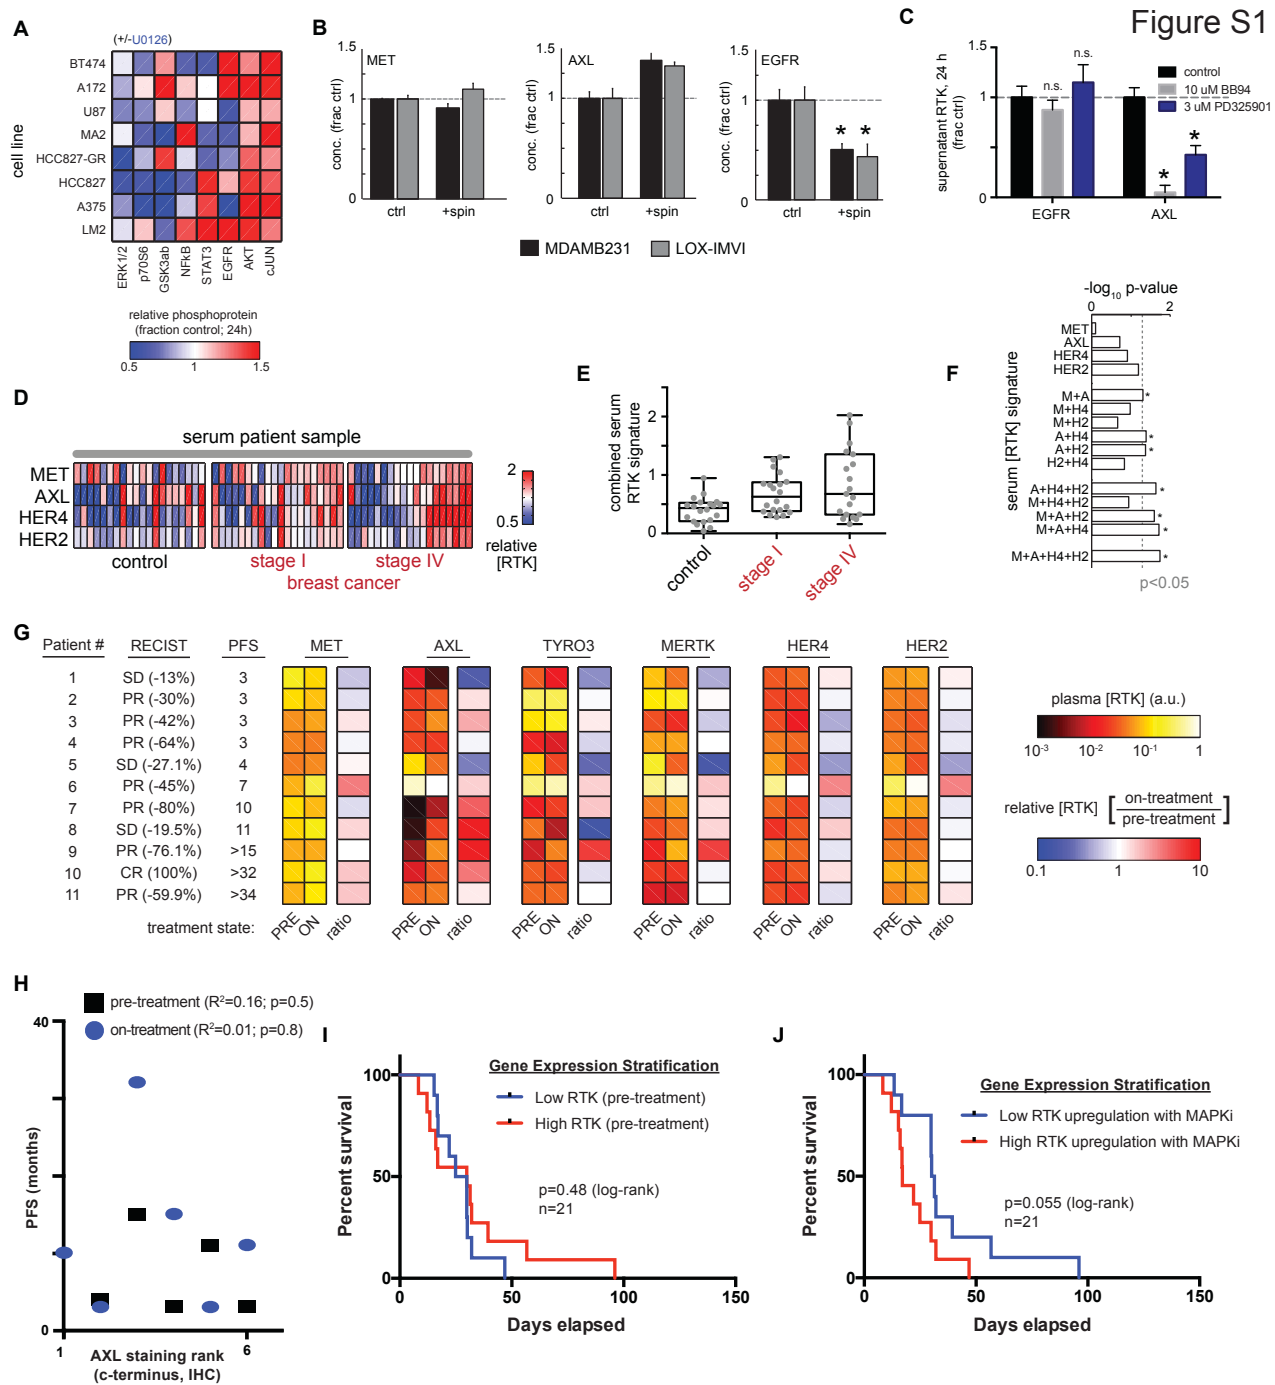

Supplement: NIHMS775831-supplement-2.pdf [file NIHMS775831-supplement-2.pdf]

A

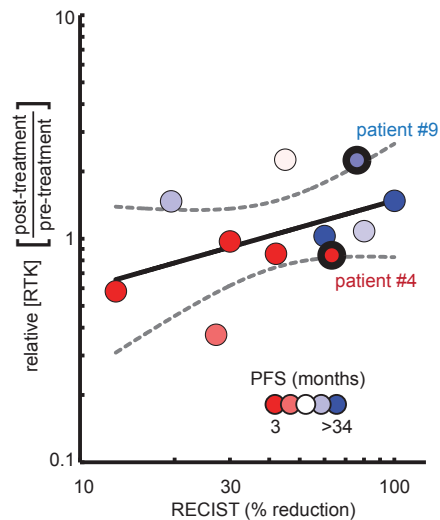

B

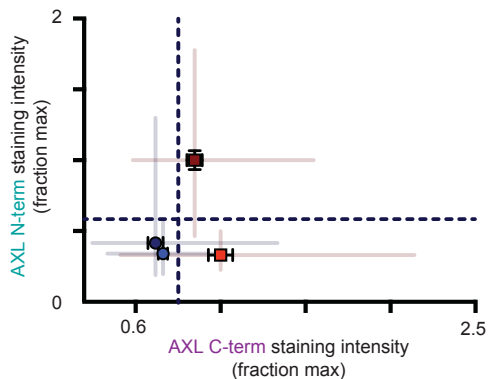

C

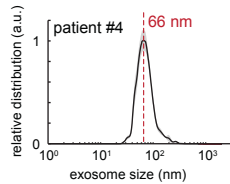

D

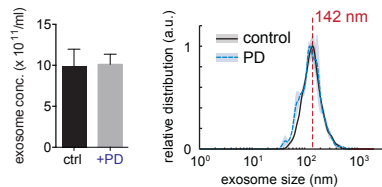

E

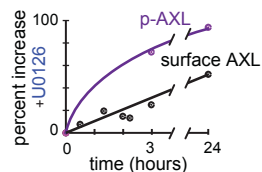

F

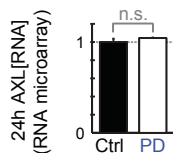

G

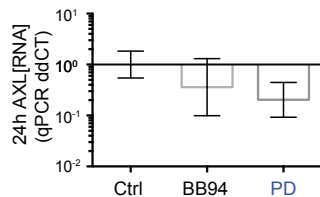

H

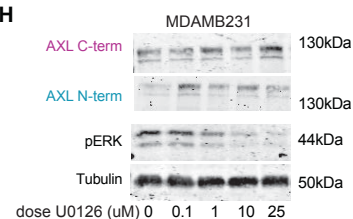

I

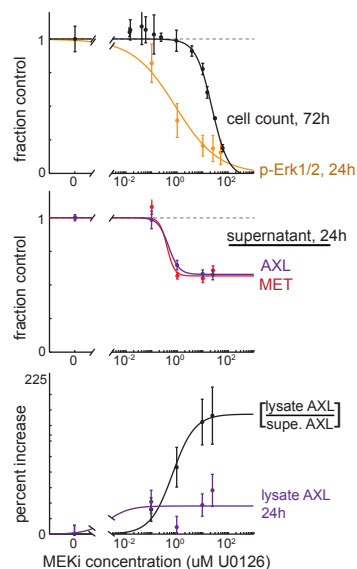

Supplement: NIHMS775831-supplement-3.pdf [file NIHMS775831-supplement-3.pdf]

**Figure S3**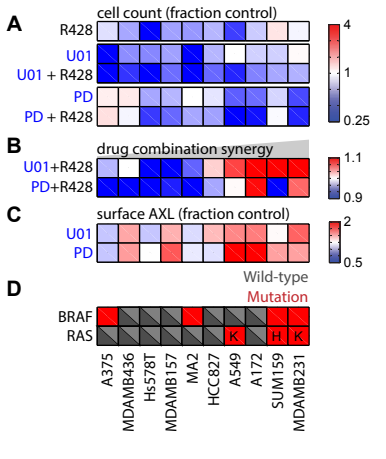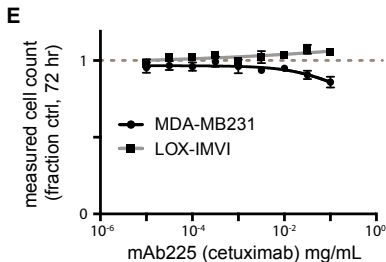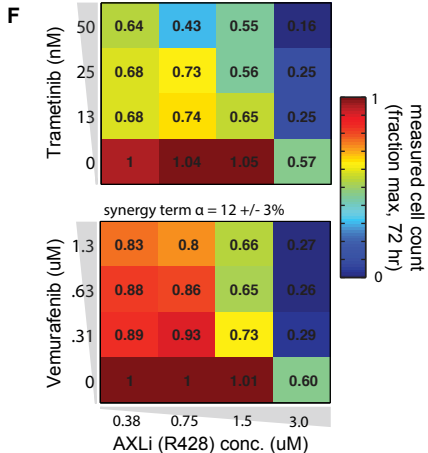

Supplement: NIHMS775831-supplement-4.pdf [file NIHMS775831-supplement-4.pdf]

Figure S4

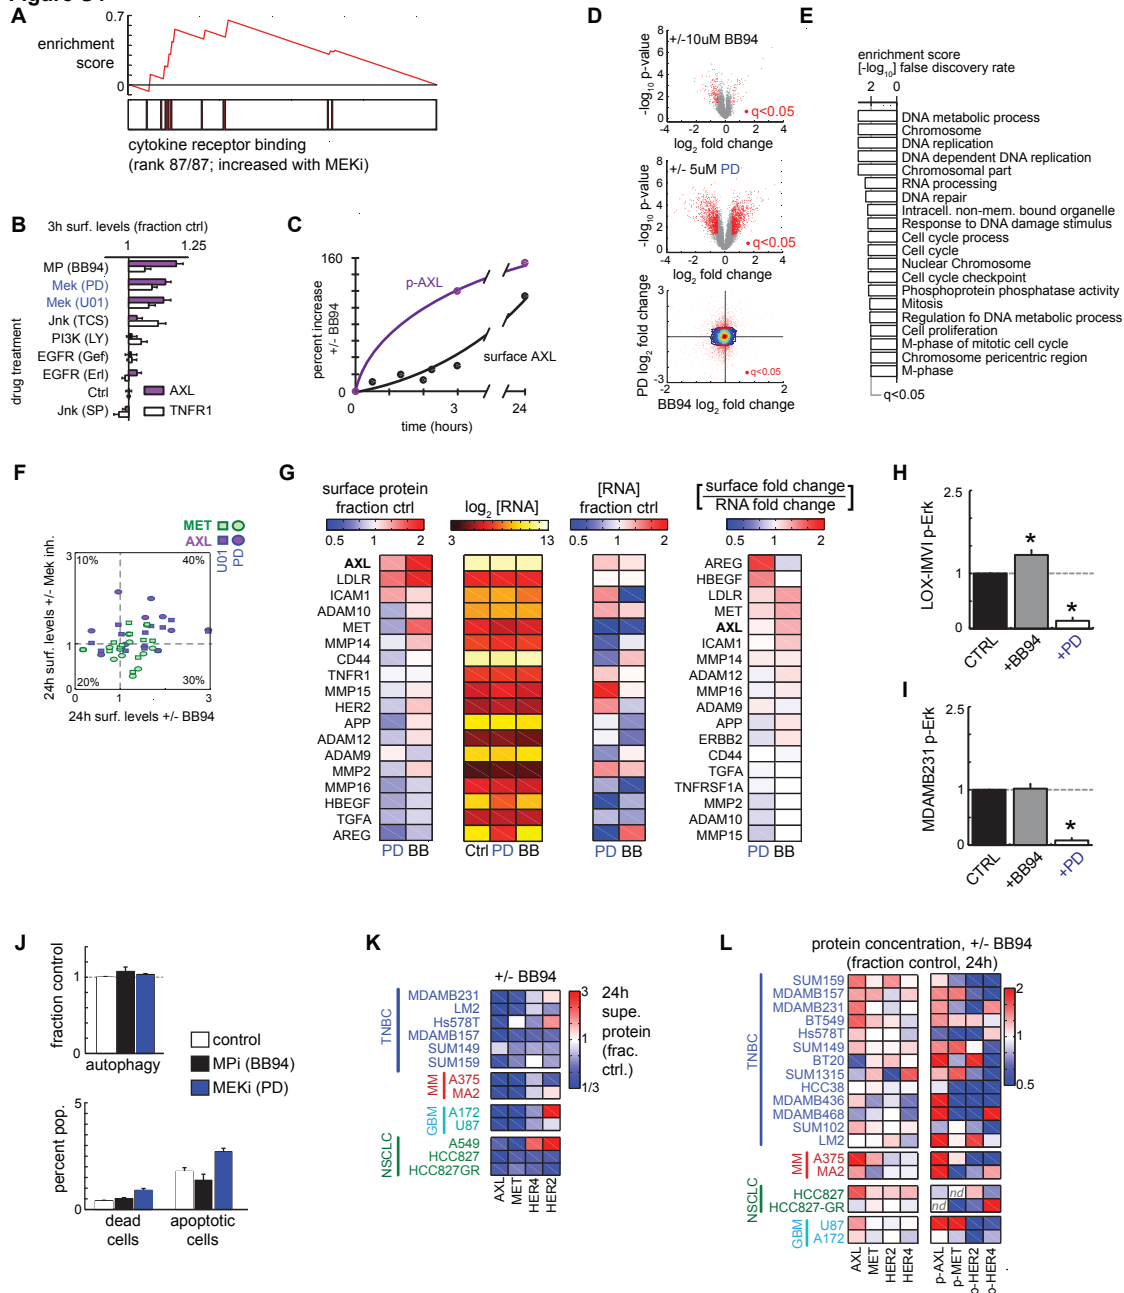

Supplement: NIHMS775831-supplement-5.pdf [file NIHMS775831-supplement-5.pdf]

**Figure S5**

**A**

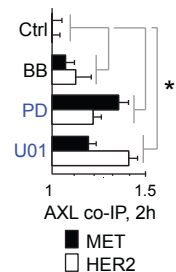

**B**

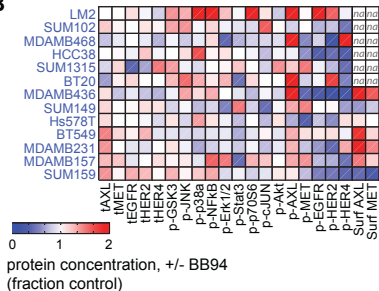

**C**

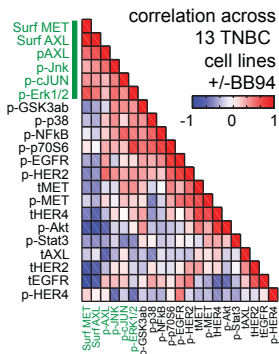

**Figure S5**

**D**

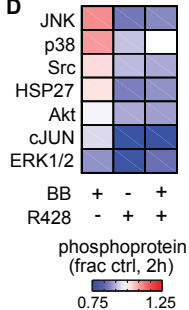

**E**

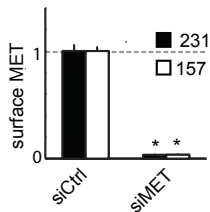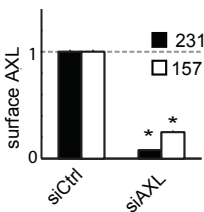

**F**

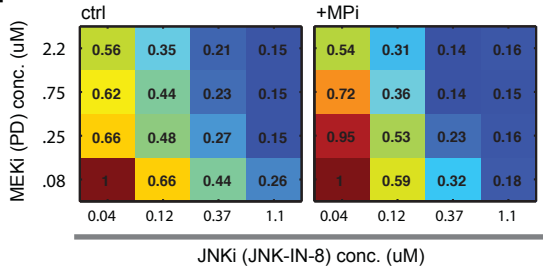

**G**

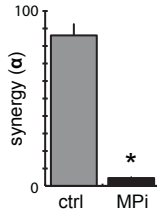

Supplement: NIHMS775831-supplement-6.pdf [file NIHMS775831-supplement-6.pdf]

**Figure S6**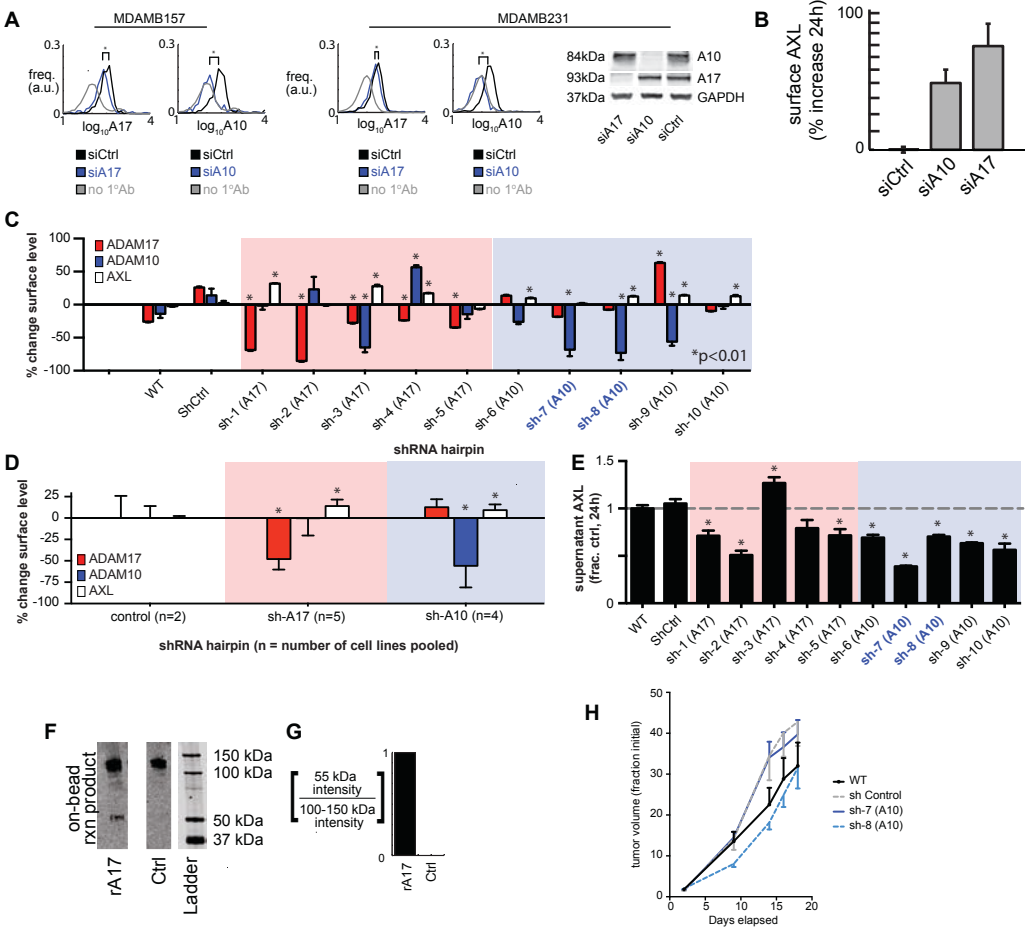

Supplement: NIHMS775831-supplement-7.pdf [file NIHMS775831-supplement-7.pdf]

**Figure S7**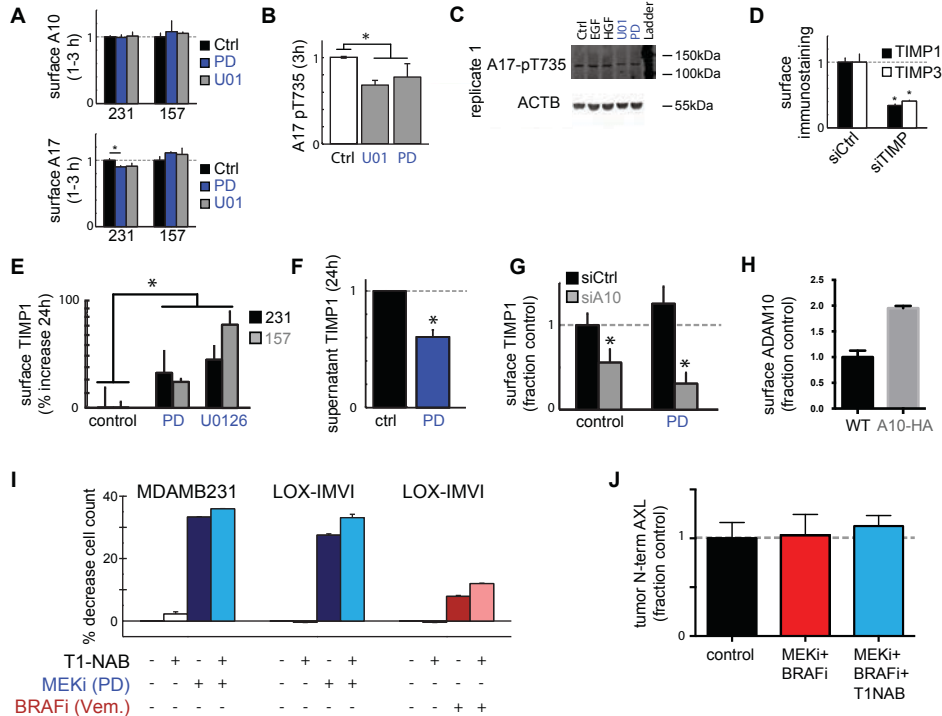

Supplement: NIHMS775831-supplement-8.pdf [file NIHMS775831-supplement-8.pdf]
